# Supplementary material
Source: MDPI journal article supplement (https://www.mdpi.com/2624-8549/4/3/46)
Supplement: s1 [file s1]

# Growing Gold Nanostars on SiO<sub>2</sub> Nanoparticles: Easily Accessible, NIR Active Core-Shell Nanostructures from PVP/DMF Reduction

Laura C. Straub, John A. Capobianco and Mathias S. Wickleder

## S1. Powder diffraction of SiO<sub>2</sub>(82nm)-NP and SiO<sub>2</sub>(82nm)@AuNP

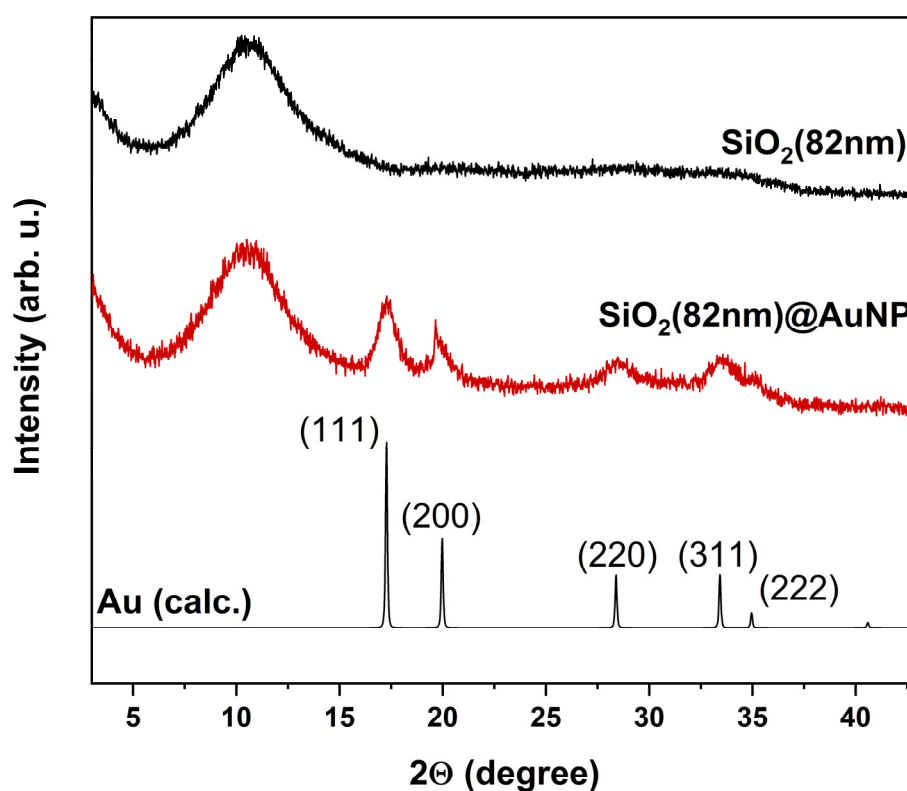

**Figure. S1** PXRD pattern of SiO<sub>2</sub>(82nm) in black, SiO<sub>2</sub>(82nm)@AuNP in red and the theoretical pattern for the face-centred cubic structure of metallic Au with the space group *Fm-3m*

## S2. TEM image of SiO<sub>2</sub>@AuNS in high yields

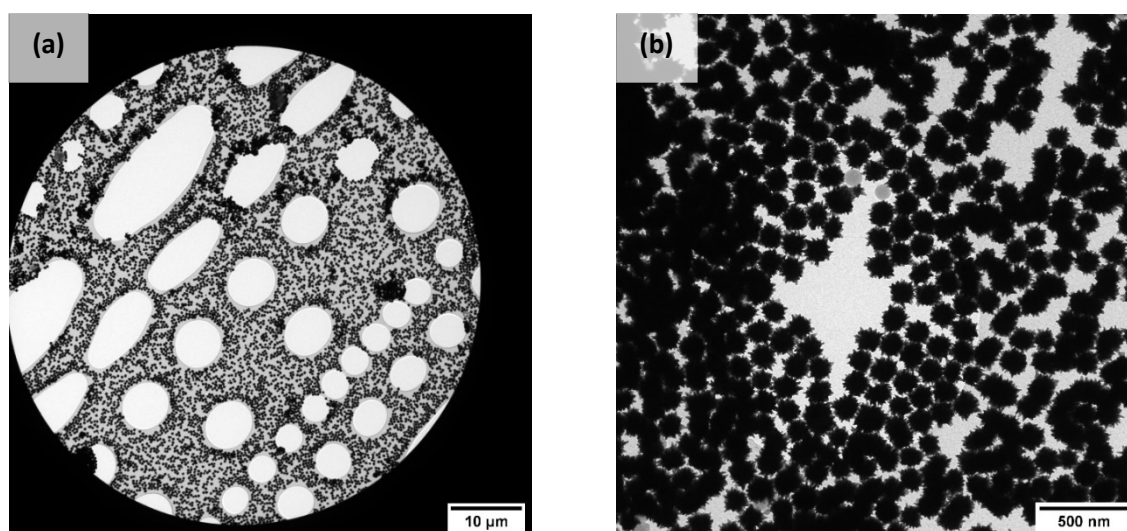

**Figure. S2** TEM image sections of SiO<sub>2</sub>@AuNS( $R = 128.0$ ) demonstrating the high ratio of coated SiO<sub>2</sub> nanoparticles with 4,000 times magnification (a) and 10,000 times magnification (b).

### S3. Stability of SiO<sub>2</sub>@AuNS after several month

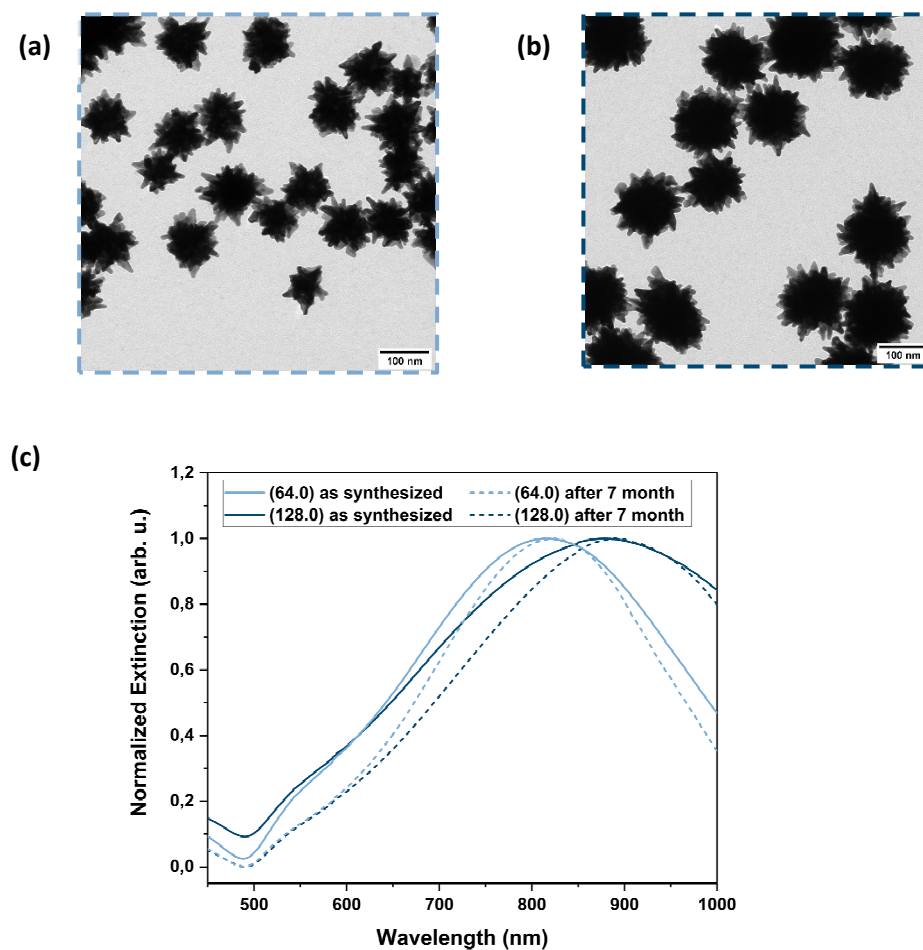

**Figure. S3** TEM images of SiO<sub>2</sub>@AuNS(*R* = 64.0, light blue) (a), and SiO<sub>2</sub>@AuNS(*R* = 128.0, dark blue) (b) stored for seven month in ethanol and corresponding extinction spectra of the nanostructures (c). Solid lines show the initial spectra while dashed lines mark the spectra of the nanostructures recorded after seven month.

## S4. Extinction spectra and TEM images of additional [HAuCl<sub>4</sub>]/[seed] mass ratios

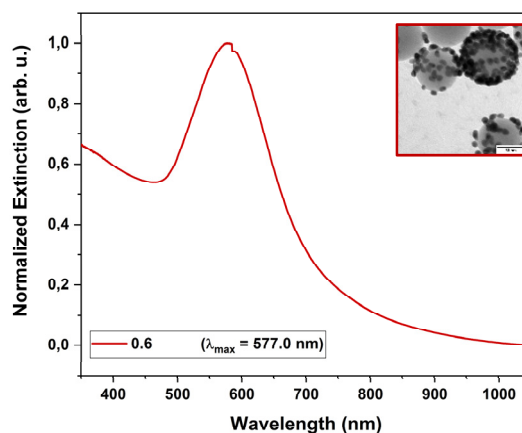

**Figure. S4–1** Extinction spectrum and TEM image of the SiO<sub>2</sub>@AuNS for  $R = 0.6$  (500.0  $\mu\text{L}$  of the seed solution) with a gold nanostructure size of  $11.3 \pm 1.9 \text{ nm}$ .

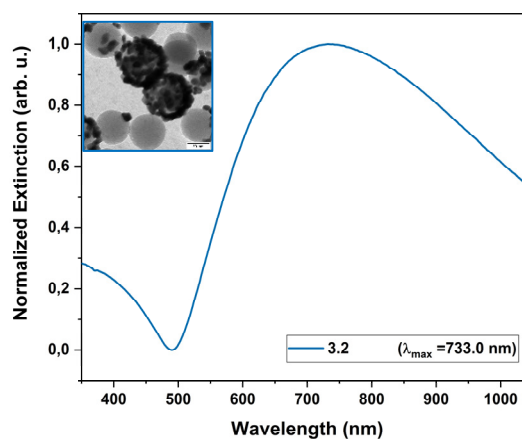

**Figure. S4–2** Extinction spectrum and TEM image of the SiO<sub>2</sub>@AuNS for  $R = 3.2$  (100.0  $\mu\text{L}$  of the seed solution) with a gold nanostructure size of  $20.4 \pm 4.6 \text{ nm}$ .

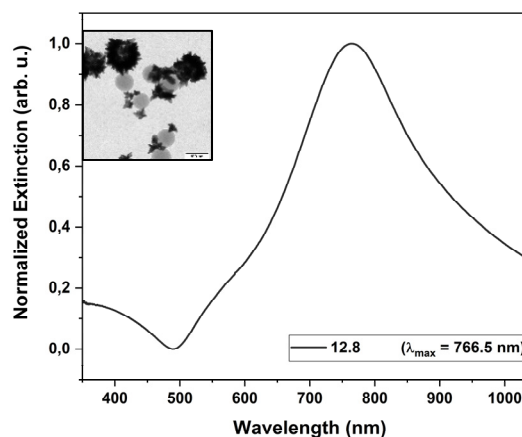

**Figure. S4–3** Extinction spectrum and TEM image of the SiO<sub>2</sub>@AuNS for  $R = 12.8$  (25.0  $\mu\text{L}$  of the seed solution) with a gold nanostructure size of  $46.0 \pm 12.8 \text{ nm}$ .

## S5. Histograms of the core and total diameters of SiO<sub>2</sub>@AuNS (TEM)

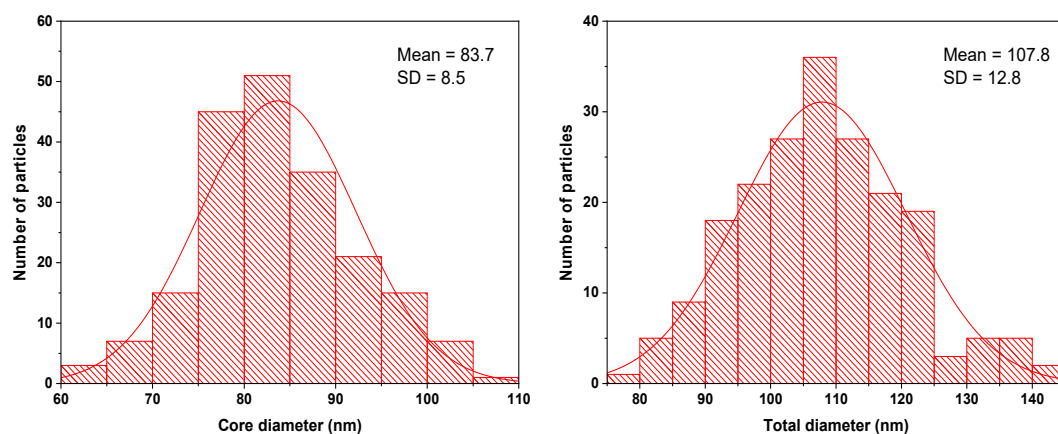

**Figure. S5-1** Histograms of the core and the total diameter of SiO<sub>2</sub>@AuNS (C) with a mass ratio of 64.0 (5.0  $\mu$ L of the seed solution) determined by TEM.

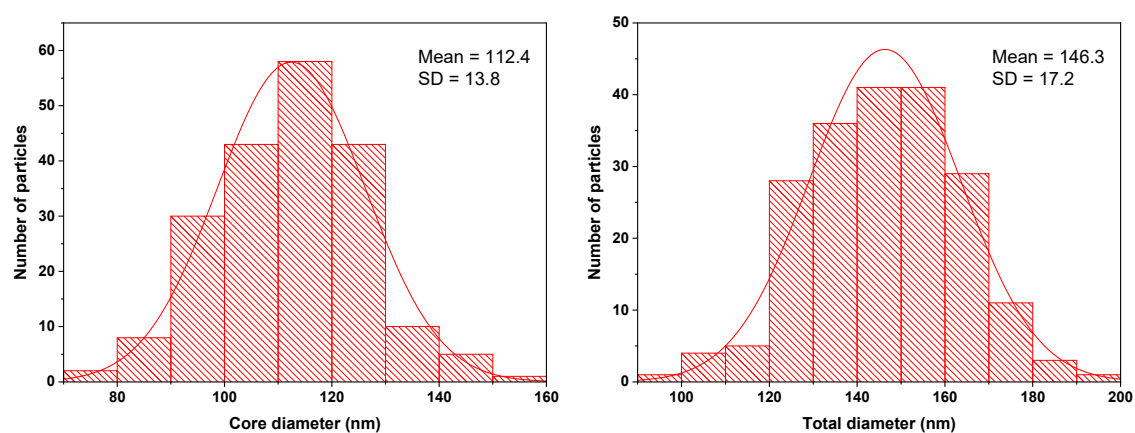

**Figure. S5-2** Histograms of the core and the total diameter of SiO<sub>2</sub>@AuNS (D) with a mass ratio of 128.0 (2.5  $\mu$ L of the seed solution) determined by TEM.

## S6. Hydrodynamic diameters of SiO<sub>2</sub>@AuNS obtained by DLS measurements

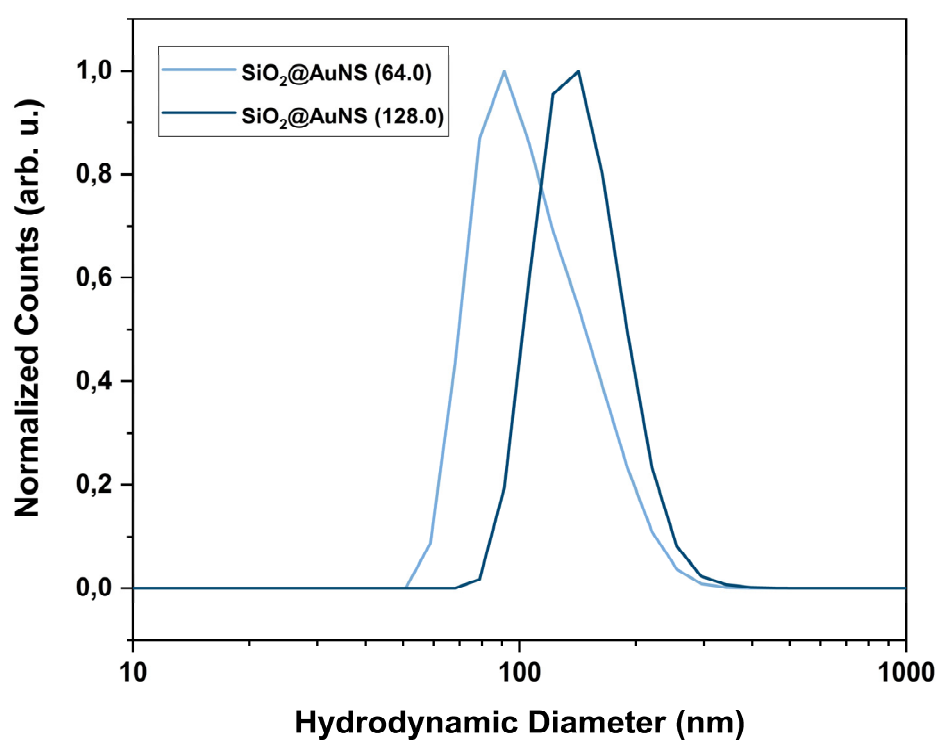

**Figure. S6** Normalized number-averaged DLS profiles of SiO<sub>2</sub>@AuNS ( $R = 64.0$ ) and SiO<sub>2</sub>@AuNS ( $R = 128.0$ ) dispersed in ethanol.
